# Supplementary material for: The Mechanism of Hepatic Encephalopathy Induced by Thioacetamide Based on Metabolomics and Proteomics: A Preliminary Study
Source: MDPI journal article supplement (doi:10.3390/ijms25010284), 2023-12-24
Supplement: s1 [file s1]

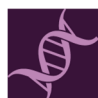

Communication

# The Mechanism of Hepatic Encephalopathy Induced by Thioacetamide Based on Metabolomics and Proteomics: A Preliminary Study

Honghui Guo <sup>1,2,3,†</sup>, Guang Wang <sup>4,†</sup>, Wei Huang <sup>1,2,3</sup>, Lingrui Li <sup>1,2,3</sup>, Yang Bai <sup>1,2,3</sup>, Haifeng Wang <sup>1,2,3</sup> and Lina Gao <sup>1,2,3,\*</sup>

<sup>1</sup> Liaoning Province Key Laboratory of Forensic Bio-Evidence Sciences, Shenyang 110122, China; 18856834146@163.com (H.G.); vivi-huang98@163.com (W.H.); lilingrui1999@163.com (L.L.); 13840852382@163.com (Y.B.); anaroberts195@gmail.com (H.W.)

<sup>2</sup> China Medical University Center of Forensic Investigation, Shenyang 110122, China

<sup>3</sup> Department of Forensic Analytical Toxicology, China Medical University, Shenyang 110122, China

<sup>4</sup> Department of Laboratory Animal Science, China Medical University, Shenyang 110122, China; gwang@cmu.edu.cn

\* Correspondence: lngao@cmu.edu.cn; Tel.: +86-189-0091-0140

† These authors contributed equally to this work.

## Supplementary Materials

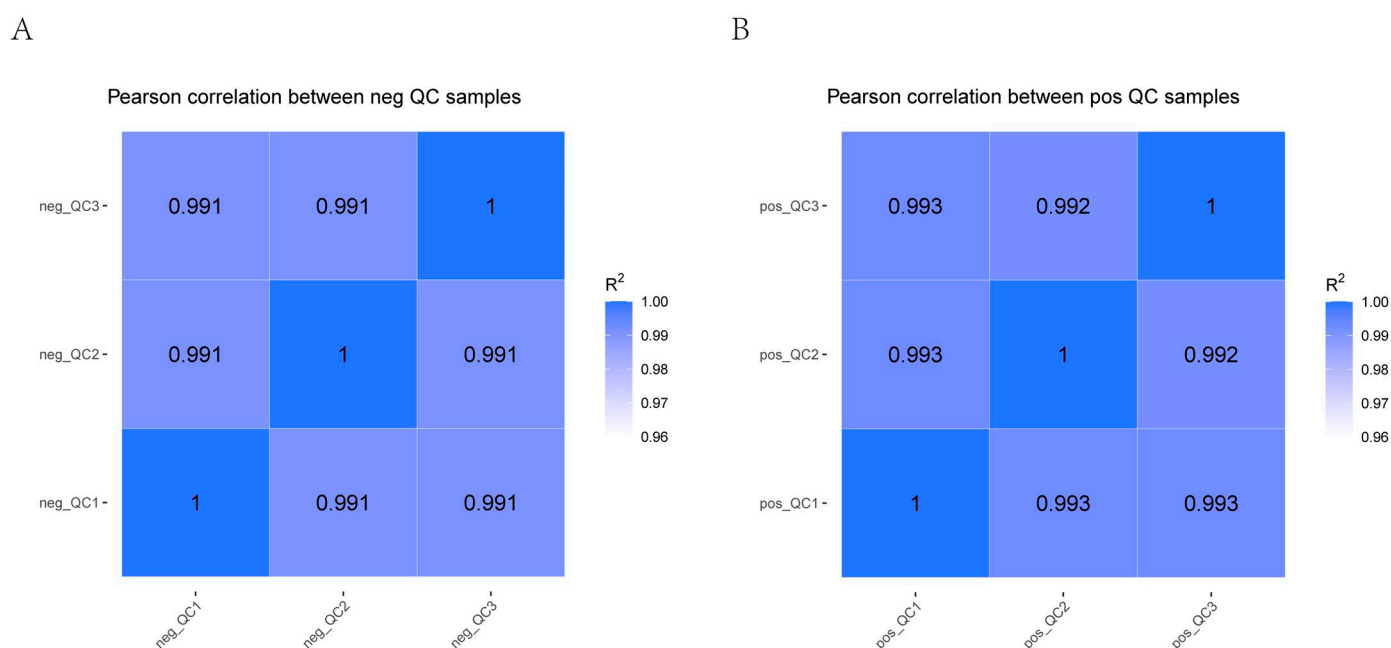

**Supplementary Figure S1. Pearson correlation between QC samples** ( the left one was obtained in the negative polarity mode, and the right one was obtained in the positive polarity mode).

**Supplementary Table S1.** The differential expressed proteins between the HE group and the control group.

| No. | Protein | Description                                                        | S.vs.C<br>FC | S.vs.C<br>Pvalue | S.vs.C<br>log2FC | S.vs.C<br>UP/DOW<br>N |
|-----|---------|--------------------------------------------------------------------|--------------|------------------|------------------|-----------------------|
| 1   | B2RPW2  | Smith-Magenis syndrome chromosome region, candidate 7-like (Human) | 1.2482       | 0.0006           | 0.3199           | up                    |
| 2   | Q3UXG7  | GDP-fucose protein O-fucosyltransferase 1                          | 1.3222       | 0.0009           | 0.4030           | up                    |
| 3   | P32233  | Developmentally-regulated GTP-binding protein 1                    | 1.2441       | 0.0010           | 0.3151           | up                    |
| 4   | Q2M4H7  | E3 ubiquitin-protein ligase CBL                                    | 0.5743       | 0.0014           | -0.800           | down                  |

|    |                |                                                                                             |        |        |         |      |
|----|----------------|---------------------------------------------------------------------------------------------|--------|--------|---------|------|
| 5  | Q3TDV5         | Uncharacterized protein                                                                     | 1.2106 | 0.0014 | 0.2757  | up   |
| 6  | Q8K0S5         | Reticulon-4 receptor-like 1                                                                 | 1.2070 | 0.0016 | 0.2715  | up   |
| 7  | O08677         | Kininogen-1                                                                                 | 1.2962 | 0.0016 | 0.3743  | up   |
| 8  | Q99P72         | Reticulon-4                                                                                 | 0.7849 | 0.0019 | -0.349  | down |
| 9  | A0A286<br>YDH6 | Calcium-dependent secretion activator 1                                                     | 0.8073 | 0.0022 | -0.309  | down |
| 10 | P21614         | Vitamin D-binding protein                                                                   | 1.2823 | 0.0022 | 0.3587  | up   |
| 11 | E0CXQ1         | High affinity cAMP-specific and IBMX-insensitive 3,5-cyclic phosphodiesterase 8B (Fragment) | 0.7529 | 0.0024 | -0.409  | down |
| 12 | Q8C4R2         | cGMP-dependent protein kinase                                                               | 0.7072 | 0.0030 | -0.500  | down |
| 13 | B0FTY3         | NudC-like protein                                                                           | 0.7524 | 0.0032 | -0.410  | down |
| 14 | A0A6M8<br>TZJ8 | ATP synthase subunit a                                                                      | 1.4468 | 0.0033 | 0.5329  | up   |
| 15 | Q8C561         | G-protein coupled receptor-associated protein LMBRD2                                        | 0.8298 | 0.0035 | -0.269  | down |
| 16 | D3Z3F8         | Spastic paraplegia 20, spartin (Troyer syndrome) homolog (human)                            | 0.8084 | 0.0036 | -0.307  | down |
| 17 | E9PUA3         | IQ motif and SEC7 domain-containing protein 1                                               | 0.7615 | 0.0037 | -0.393  | down |
| 18 | Q5U430         | E3 ubiquitin-protein ligase UBR3                                                            | 0.8292 | 0.0037 | -0.270  | down |
| 19 | Q8VDZ4         | Palmitoyltransferase ZDHHC5                                                                 | 0.5818 | 0.0039 | -0.781  | down |
| 20 | O35945         | Aldehyde dehydrogenase, cytosolic 1                                                         | 1.3535 | 0.0041 | 0.4368  | up   |
| 21 | E9PV26         | Proline-rich 36                                                                             | 0.8159 | 0.0042 | -0.293  | down |
| 22 | Q7M750         | Opalin                                                                                      | 0.5527 | 0.0043 | -0.855  | down |
| 23 | Q3V2C6         | IF rod domain-containing protein                                                            | 1.2587 | 0.0044 | 0.3320  | up   |
| 24 | O88704         | Potassium/sodium hyperpolarization-activated cyclic nucleotide-gated channel 1              | 0.8164 | 0.0045 | -0.293  | down |
| 25 | Q9JIG4         | Protein phosphatase 1 regulatory subunit 3F                                                 | 0.6713 | 0.0045 | -0.575  | down |
| 26 | F8WGR0         | Alpha-adducin                                                                               | 0.6776 | 0.0048 | -0.561  | down |
| 27 | P06728         | Apolipoprotein A-IV                                                                         | 1.3567 | 0.0049 | 0.4402  | up   |
| 28 | Q4VAA2         | Protein CDV3                                                                                | 0.7621 | 0.0054 | -0.392  | down |
| 29 | Q330P7         | SCF apoptosis response protein 1                                                            | 0.7234 | 0.0057 | -0.467  | down |
| 30 | Q3TVY3         | Uncharacterized protein                                                                     | 1.2782 | 0.0059 | 0.3542  | up   |
| 31 | Q3TIB7         | Gamma-tubulin complex component                                                             | 1.4380 | 0.0060 | 0.5241  | up   |
| 32 | Q7TSJ2         | Microtubule-associated protein 6                                                            | 0.7710 | 0.0060 | -0.375  | down |
| 33 | Q3TR92         | Ion_trans domain-containing protein                                                         | 0.5795 | 0.0063 | -0.7870 | down |
| 34 | P63054         | Calmodulin regulator protein PCP4                                                           | 0.6648 | 0.0063 | -0.589  | down |
| 35 | Q2UZW7         | Microtubule-associated protein                                                              | 0.7623 | 0.0063 | -0.392  | down |
| 36 | Q3UBT6         | Protein kinase domain-containing protein                                                    | 0.7111 | 0.0064 | -0.492  | down |
| 37 | Q9ET77         | Junctophilin-3                                                                              | 0.7357 | 0.0066 | -0.443  | down |
| 38 | Q571F3         | MFLJ00061 protein (Fragment)                                                                | 0.8269 | 0.0069 | -0.274  | down |
| 39 | Q3UZP4         | Small VCP/p97-interacting protein                                                           | 0.7803 | 0.0071 | -0.358  | down |
| 40 | Q8K2F8         | Protein LSM14 homolog A                                                                     | 0.8022 | 0.0071 | -0.318  | down |
| 41 | Q8R1T1         | Charged multivesicular body protein 7                                                       | 0.8081 | 0.0072 | -0.307  | down |
| 42 | A2AJI1         | MAP7 domain-containing protein 1                                                            | 0.6431 | 0.0076 | -0.637  | down |
| 43 | P22599         | Alpha-1-antitrypsin 1-2                                                                     | 1.6445 | 0.0076 | 0.7177  | up   |
| 44 | Q921I1         | Serotransferrin                                                                             | 1.4633 | 0.0076 | 0.5493  | up   |
| 45 | Q9JM96         | Cdc42 effector protein 4                                                                    | 0.7358 | 0.0077 | -0.442  | down |
| 46 | Q6NS82         | Reticulophagy regulator 2                                                                   | 0.7818 | 0.0077 | -0.355  | down |
| 47 | Q9CWE0         | Mitochondrial fission regulator 1-like                                                      | 0.7781 | 0.0078 | -0.362  | down |
| 48 | Q8BNA5         | SH3 domain-containing protein                                                               | 0.6565 | 0.0078 | -0.607  | down |
| 49 | Q9QYX7         | Protein piccolo                                                                             | 0.8049 | 0.0080 | -0.313  | down |
| 50 | A0A087<br>WQ92 | Histone deacetylase 4 (Fragment)                                                            | 0.7136 | 0.0081 | -0.487  | down |
| 51 | V9GXD9         | Synergina gamma                                                                             | 0.7784 | 0.0081 | -0.361  | down |

|    |                |                                                                              |        |        |        |      |
|----|----------------|------------------------------------------------------------------------------|--------|--------|--------|------|
| 52 | Q9ERG2         | Striatin-3                                                                   | 0.8205 | 0.0082 | -0.285 | down |
| 53 | Q91ZZ3         | Beta-synuclein                                                               | 0.6520 | 0.0084 | -0.617 | down |
| 54 | Q5U3K5         | Rab-like protein 6                                                           | 0.8315 | 0.0086 | -0.266 | down |
| 55 | O08539         | Myc box-dependent-interacting protein 1                                      | 0.8090 | 0.0087 | -0.306 | down |
| 56 | P49070         | Guided entry of tail-anchored proteins factor CAMLG                          | 0.6920 | 0.0087 | -0.531 | down |
| 57 | Q546G4         | Serum albumin                                                                | 1.7843 | 0.0090 | 0.8354 | up   |
| 58 | Q9CZN4         | Protein shisa-9                                                              | 0.7008 | 0.0091 | -0.513 | down |
| 59 | Q8C181         | Muscleblind-like protein 2                                                   | 0.8274 | 0.0092 | -0.273 | down |
| 60 | Q7TQG1         | Pleckstrin homology domain-containing family A member 6                      | 0.8221 | 0.0093 | -0.282 | down |
| 61 | Q00623         | Apolipoprotein A-I                                                           | 1.4901 | 0.0095 | 0.5754 | up   |
| 62 | G3UZ30         | E3 ubiquitin-protein ligase PPP1R11 (Fragment)                               | 0.4652 | 0.0095 | -1.104 | down |
| 63 | O55047         | Serine/threonine-protein kinase tousled-like 2                               | 0.7889 | 0.0095 | -0.342 | down |
| 64 | A0A668<br>KLC6 | Microtubule-associated protein                                               | 0.6582 | 0.0097 | -0.603 | down |
| 65 | A0A2R8<br>W6S4 | Protein kinase C and casein kinase substrate in neurons protein 2 (Fragment) | 0.5365 | 0.0097 | -0.898 | down |
| 66 | Q99JX6         | Annexin                                                                      | 1.4250 | 0.0098 | 0.5110 | up   |
| 67 | E9PUC5         | PH and SEC7 domain-containing protein 3                                      | 0.6608 | 0.0098 | -0.598 | down |
| 68 | Q4FJL2         | Reticulon                                                                    | 0.5887 | 0.0099 | -0.764 | down |
| 69 | G3X8Q5         | Ceruloplasmin                                                                | 1.4267 | 0.0101 | 0.5128 | up   |
| 70 | A2ARP8         | Microtubule-associated protein 1A                                            | 0.7194 | 0.0101 | -0.475 | down |
| 71 | A0A668<br>KLV9 | A-kinase anchor protein 12                                                   | 0.7223 | 0.0103 | -0.469 | down |
| 72 | P01027         | Complement C3                                                                | 1.2231 | 0.0103 | 0.2906 | up   |
| 73 | Q6PEV3         | WAS/WASL-interacting protein family member 2                                 | 0.6808 | 0.0104 | -0.555 | down |
| 74 | Q8VD12         | Zinc finger protein 385A                                                     | 0.7434 | 0.0106 | -0.428 | down |
| 75 | Q3UNH4         | G protein-regulated inducer of neurite outgrowth 1                           | 0.7512 | 0.0106 | -0.413 | down |
| 76 | D0VYV6         | Band 4.1-like protein 3                                                      | 0.8311 | 0.0106 | -0.267 | down |
| 77 | H3BLG8         | Protein CUSTOS (Fragment)                                                    | 0.5062 | 0.0108 | -0.982 | down |
| 78 | Q9ES97         | Reticulon-3                                                                  | 0.7044 | 0.0110 | -0.505 | down |
| 79 | E9Q1K3         | Alpha-adducin                                                                | 0.7134 | 0.0111 | -0.487 | down |
| 80 | Q8R318         | 2310005E10Rik protein                                                        | 1.2351 | 0.0112 | 0.3047 | up   |
| 81 | Q3TDD8         | RRM domain-containing protein                                                | 0.8221 | 0.0113 | -0.283 | down |
| 82 | E9Q7M2         | TSC22 domain family, member 2                                                | 0.7663 | 0.0114 | -0.384 | down |
| 83 | Q8VD37         | SH3-containing GRB2-like protein 3-interacting protein 1                     | 0.8256 | 0.0117 | -0.276 | down |
| 84 | O88271         | Craniofacial development protein 1                                           | 0.7919 | 0.0120 | -0.337 | down |
| 85 | A0A1B0<br>GT88 | Brain-enriched guanylate kinase-associated protein                           | 0.7198 | 0.0120 | -0.474 | down |
| 86 | Q71M36         | Chondroitin sulfate proteoglycan 5                                           | 0.7995 | 0.0124 | -0.323 | down |
| 87 | A0A0R4J<br>2A2 | Ankyrin repeat and sterile alpha motif domain-containing protein 1B          | 0.3357 | 0.0125 | -1.575 | down |
| 88 | S4R1C4         | Calcium-transporting ATPase                                                  | 0.7818 | 0.0129 | -0.355 | down |
| 89 | Q78YZ6         | Short coiled-coil protein                                                    | 0.6978 | 0.0131 | -0.519 | down |
| 90 | P14873         | Microtubule-associated protein 1B                                            | 0.8208 | 0.0132 | -0.285 | down |
| 91 | Q9QXF8         | Glycine N-methyltransferase                                                  | 1.3566 | 0.0133 | 0.4400 | up   |
| 92 | Q9Z0P4         | Paralemmin-1                                                                 | 0.8076 | 0.0135 | -0.308 | down |
| 93 | Q6A065         | Centrosomal protein of 170 kDa                                               | 0.7881 | 0.0135 | -0.344 | down |
| 94 | Q6ZQ68         | MKIAA0687 protein (Fragment)                                                 | 0.7257 | 0.0136 | -0.462 | down |
| 95 | A0A0N4<br>SV74 | WASH complex subunit 2 (Fragment)                                            | 0.8180 | 0.0136 | -0.290 | down |
| 96 | P04247         | Myoglobin                                                                    | 2.0111 | 0.0139 | 1.0080 | up   |
| 97 | A0A7N9<br>VR94 | AHNAK nucleoprotein 2                                                        | 0.6404 | 0.0139 | -0.643 | down |

|     |                |                                                           |        |        |        |      |
|-----|----------------|-----------------------------------------------------------|--------|--------|--------|------|
| 98  | Q80W47         | WD repeat domain phosphoinositide-interacting protein 2   | 0.8236 | 0.0140 | -0.280 | down |
| 99  | Q9DC07         | LIM zinc-binding domain-containing Nebulette              | 0.7755 | 0.0141 | -0.367 | down |
| 100 | F6RRH9         | Dynamin-1 (Fragment)                                      | 0.5399 | 0.0142 | -0.889 | down |
| 101 | O08919         | Numb-like protein                                         | 0.8297 | 0.0142 | -0.269 | down |
| 102 | Q8CCJ4         | APC membrane recruitment protein 2                        | 0.7644 | 0.0143 | -0.387 | down |
| 103 | Q8CH25         | SAFB-like transcription modulator                         | 0.7869 | 0.0144 | -0.346 | down |
| 104 | Q76N33         | AMSH-like protease                                        | 0.7805 | 0.0144 | -0.357 | down |
| 105 | Q80U23         | Syntaphilin                                               | 0.7292 | 0.0147 | -0.455 | down |
| 106 | Q8K1M6         | Dynamin-1-like protein                                    | 0.8126 | 0.0148 | -0.299 | down |
| 107 | A0A0A0<br>MQC7 | Microtubule-associated protein                            | 0.7644 | 0.0148 | -0.387 | down |
| 108 | Q8CBM0         | Uncharacterized protein                                   | 0.7518 | 0.0151 | -0.412 | down |
| 109 | Q5DTJ4         | MKIAA4178 protein (Fragment)                              | 0.7907 | 0.0151 | -0.339 | down |
| 110 | Q8C3W1         | Uncharacterized protein C1orf198 homolog                  | 0.7693 | 0.0152 | -0.378 | down |
| 111 | Q3UHE3         | Ig-like domain-containing protein                         | 1.2827 | 0.0157 | 0.3592 | up   |
| 112 | Q9JMK2         | Casein kinase I isoform epsilon                           | 0.7714 | 0.0157 | -0.374 | down |
| 113 | B1AXZ5         | ELAV-like protein                                         | 0.7248 | 0.0157 | -0.464 | down |
| 114 | E9Q3E3         | Glycine receptor subunit beta                             | 0.8121 | 0.0158 | -0.300 | down |
| 115 | P23953         | Carboxylesterase 1C                                       | 1.2878 | 0.0158 | 0.3649 | up   |
| 116 | I7HJR3         | Beta-2-glycoprotein 1 (Fragment)                          | 1.2463 | 0.0159 | 0.3177 | up   |
| 117 | A0A1D5<br>RL96 | BTB/POZ domain-containing protein 8                       | 0.6560 | 0.0162 | -0.608 | down |
| 118 | Q91X72         | Hemopexin                                                 | 1.4401 | 0.0165 | 0.5262 | up   |
| 119 | O88737         | Protein bassoon                                           | 0.7582 | 0.0166 | -0.399 | down |
| 120 | Q9R0L7         | A-kinase anchor protein 8-like                            | 1.3166 | 0.0167 | 0.3969 | up   |
| 121 | O55042         | Alpha-synuclein                                           | 0.7535 | 0.0168 | -0.408 | down |
| 122 | Q3UWT7         | Phospholipase D (Fragment)                                | 1.2321 | 0.0169 | 0.3012 | up   |
| 123 | A8DUP7         | Beta-globin                                               | 1.5921 | 0.0170 | 0.6710 | up   |
| 124 | Q61838         | Pregnancy zone protein                                    | 1.3931 | 0.0171 | 0.4784 | up   |
| 125 | A2RRY2         | 2310046A06Rik protein                                     | 0.7133 | 0.0172 | -0.487 | down |
| 126 | P07758         | Alpha-1-antitrypsin 1-1                                   | 2.2548 | 0.0173 | 1.1730 | up   |
| 127 | Q9D1J3         | SAP domain-containing ribonucleoprotein                   | 0.6887 | 0.0179 | -0.538 | down |
| 128 | Q9ERU3         | Zinc finger protein 22                                    | 0.7949 | 0.0180 | -0.331 | down |
| 129 | Q5EBJ4         | Ermin                                                     | 0.7331 | 0.0188 | -0.448 | down |
| 130 | Q543N3         | LIM and SH3 domain protein 1                              | 0.7048 | 0.0189 | -0.505 | down |
| 131 | Q9QYK7         | RING finger protein 11                                    | 0.8064 | 0.0193 | -0.310 | down |
| 132 | E9Q8N8         | Anion exchange protein                                    | 0.7061 | 0.0195 | -0.502 | down |
| 133 | P06909         | Complement factor H                                       | 1.2473 | 0.0195 | 0.3189 | up   |
| 134 | Q3U007         | Uncharacterized protein                                   | 0.7488 | 0.0199 | -0.417 | down |
| 135 | A0A0B4J<br>1E2 | SNW domain-containing protein 1                           | 0.7987 | 0.0201 | -0.324 | down |
| 136 | D3YXK2         | Scaffold attachment factor B1                             | 0.8226 | 0.0203 | -0.282 | down |
| 137 | D3YVR9         | RIKEN cDNA 1110004F10 gene                                | 0.7873 | 0.0205 | -0.345 | down |
| 138 | A0A2I3B<br>RM6 | Heterogeneous nuclear ribonucleoproteins C1/C2 (Fragment) | 0.7065 | 0.0206 | -0.501 | down |
| 139 | A2ANL1         | Solute carrier family 23 member 2 (Fragment)              | 0.6268 | 0.0207 | -0.674 | down |
| 140 | F7AA26         | Paralemmin A kinase anchor protein (Fragment)             | 0.7950 | 0.0209 | -0.331 | down |
| 141 | Q8K232         | Adducin 1 (Alpha)                                         | 0.8119 | 0.0210 | -0.301 | down |
| 142 | B5TVM2         | Immunoglobulin-like domain-containing receptor 2          | 0.8302 | 0.0210 | -0.268 | down |
| 143 | Q8BR92         | Paralemmin-2                                              | 0.7539 | 0.0212 | -0.407 | down |
| 144 | Q9JKS5         | Intracellular hyaluronan-binding protein 4                | 0.8284 | 0.0215 | -0.272 | down |
| 145 | P27546         | Microtubule-associated protein 4                          | 0.8073 | 0.0216 | -0.309 | down |
| 146 | G3X9G2         | Misshapen-like kinase 1                                   | 0.7219 | 0.0217 | -0.470 | down |

|     |             |                                                          |        |        |        |      |
|-----|-------------|----------------------------------------------------------|--------|--------|--------|------|
| 147 | Q8CGC4      | Protein LSM14 homolog B                                  | 0.6682 | 0.0221 | -0.581 | down |
| 148 | P13634      | Carbonic anhydrase 1                                     | 1.2815 | 0.0226 | 0.3579 | up   |
| 149 | P97825      | Jupiter microtubule associated homolog 1                 | 0.7545 | 0.0226 | -0.406 | down |
| 150 | A0A411P8U6  | Myelin basic protein (Fragment)                          | 0.7495 | 0.0228 | -0.416 | down |
| 151 | Q8K327      | Chromosome alignment-maintaining phosphoprotein 1        | 0.6621 | 0.0229 | -0.595 | down |
| 152 | Q542T4      | Myelin basic protein                                     | 0.6550 | 0.0231 | -0.610 | down |
| 153 | B2RWU4      | Cordon-bleu                                              | 0.7628 | 0.0234 | -0.391 | down |
| 154 | Q4FJM2      | Cyclin-dependent kinase inhibitor 1B                     | 0.8173 | 0.0244 | -0.291 | down |
| 155 | B7ZNJ3      | Caskin1 protein                                          | 0.8085 | 0.0247 | -0.307 | down |
| 156 | A0A0R4J1G9  | Metalloreductase STEAP3                                  | 1.2113 | 0.0248 | 0.2766 | up   |
| 157 | Q9CU36      | Protein kinase domain-containing protein (Fragment)      | 0.7963 | 0.0249 | -0.329 | down |
| 158 | Q80UP8      | Sodium-dependent phosphate transporter 2                 | 0.7303 | 0.0249 | -0.453 | down |
| 159 | E9Q1G8      | Septin                                                   | 0.7974 | 0.0251 | -0.327 | down |
| 160 | A0A654I1CL5 | Connexin p1                                              | 0.8195 | 0.0252 | -0.287 | down |
| 161 | Q3UHN4      | Voltage-dependent P/Q-type calcium channel subunit alpha | 0.8188 | 0.0252 | -0.288 | down |
| 162 | Q9WV69      | Dematin                                                  | 0.7942 | 0.0253 | -0.332 | down |
| 163 | A0A3B2WCD2  | Serine/threonine-protein kinase LMTK3                    | 0.7762 | 0.0253 | -0.365 | down |
| 164 | Q3ULL6      | UPF3 regulator of nonsense transcripts homolog B (yeast) | 0.6153 | 0.0255 | -0.701 | down |
| 165 | P01872      | Immunoglobulin heavy constant mu                         | 1.2060 | 0.0255 | 0.2703 | up   |
| 166 | Q8BG13      | RNA-binding protein 3                                    | 0.7972 | 0.0265 | -0.327 | down |
| 167 | S4R1Y1      | Cullin-9                                                 | 0.6676 | 0.0279 | -0.583 | down |
| 168 | Q8BNE1      | TRPM8 channel-associated factor 1                        | 1.5458 | 0.0282 | 0.6284 | up   |
| 169 | C0HKD9      | Microfibrillar-associated protein 1B                     | 0.8283 | 0.0287 | -0.272 | down |
| 170 | D3Z5K8      | SH3 and multiple ankyrin repeat domains protein 2        | 0.7727 | 0.0289 | -0.372 | down |
| 171 | D3YX76      | Glutathione S-transferase                                | 1.4115 | 0.0291 | 0.4972 | up   |
| 172 | Q99P69      | Kinetochore protein Nuf2                                 | 0.7121 | 0.0306 | -0.490 | down |
| 173 | Q5M9P7      | Calcium regulated heat stable protein 1                  | 0.8298 | 0.0307 | -0.269 | down |
| 174 | Q3TDE4      | Nicastrin (Fragment)                                     | 1.2021 | 0.0307 | 0.2656 | up   |
| 175 | Q3TNL6      | Anion exchange protein                                   | 1.3543 | 0.0309 | 0.4376 | up   |
| 176 | P07759      | Serine protease inhibitor A3K                            | 1.6049 | 0.0309 | 0.6825 | up   |
| 177 | A0A0J9YTU3  | Cytospin-B                                               | 0.8295 | 0.0317 | -0.270 | down |
| 178 | Q3T1F6      | Myelin-associated glycoprotein                           | 0.5812 | 0.0317 | -0.783 | down |
| 179 | Q3UI81      | Uncharacterized protein                                  | 0.8053 | 0.0320 | -0.312 | down |
| 180 | Q14BB9      | MAP6 domain-containing protein 1                         | 0.7932 | 0.0321 | -0.334 | down |
| 181 | A0A087WPF5  | AN1-type zinc finger protein 2B (Fragment)               | 0.7558 | 0.0322 | -0.404 | down |
| 182 | F7B1A4      | Mitochondrial fission factor (Fragment)                  | 0.6561 | 0.0325 | -0.608 | down |
| 183 | Q69ZQ5      | MKIAA1150 protein (Fragment)                             | 0.7718 | 0.0327 | -0.374 | down |
| 184 | E9PYD9      | Folate receptor alpha (Fragment)                         | 1.4730 | 0.0327 | 0.5588 | up   |
| 185 | Q3TM89      | PEST proteolytic signal-containing nuclear protein       | 0.8264 | 0.0332 | -0.275 | down |
| 186 | Q68ED7      | CREB-regulated transcription coactivator 1               | 0.8171 | 0.0341 | -0.291 | down |
| 187 | Q810M8      | Ubiquitinyl hydrolase 1 (Fragment)                       | 0.8082 | 0.0342 | -0.307 | down |
| 188 | Q05D14      | Clmn protein (Fragment)                                  | 0.8045 | 0.0343 | -0.314 | down |
| 189 | Q80YN3      | Breast carcinoma-amplified sequence 1 homolog            | 0.8088 | 0.0344 | -0.306 | down |
| 190 | E9PZ43      | Microtubule-associated protein                           | 0.7043 | 0.0344 | -0.506 | down |
| 191 | Q8BHL7      | CDC42 small effector protein 1                           | 0.7557 | 0.0344 | -0.404 | down |
| 192 | Q9QUN9      | Dickkopf-related protein 3                               | 1.2011 | 0.0353 | 0.2645 | up   |
| 193 | Q3TSA8      | Secretory carrier-associated membrane protein            | 0.7858 | 0.0354 | -0.348 | down |

|     |                |                                                            |        |        |        |      |
|-----|----------------|------------------------------------------------------------|--------|--------|--------|------|
| 194 | Q9DB90         | Protein SMG9                                               | 0.7969 | 0.0357 | -0.327 | down |
| 195 | Q3TIU3         | Alpha-2-HS-glycoprotein                                    | 1.3145 | 0.0357 | 0.3946 | up   |
| 196 | Q6QWF9         | Calcium/calmodulin-dependent protein kinase II inhibitor 1 | 0.7942 | 0.0361 | -0.332 | down |
| 197 | Q9CY06         | GLOBIN domain-containing protein                           | 1.5553 | 0.0364 | 0.6372 | up   |
| 198 | Q2VPR3         | 2500003M10Rik protein (Fragment)                           | 0.7723 | 0.0366 | -0.373 | down |
| 199 | A0A0N4<br>SUV3 | Vesicle-associated membrane protein 1 (Fragment)           | 0.8090 | 0.0369 | -0.306 | down |
| 200 | Q54AC6         | Cox17p                                                     | 0.8325 | 0.0371 | -0.264 | down |
| 201 | P60761         | Neurogranin                                                | 0.4650 | 0.0372 | -1.104 | down |
| 202 | Q91VH6         | Protein MEMO1                                              | 1.2144 | 0.0376 | 0.2803 | up   |
| 203 | Q08EE0         | 2310022M17Rik protein                                      | 0.7489 | 0.0377 | -0.417 | down |
| 204 | A0A0F7<br>QZE4 | MAb 110 heavy chain                                        | 1.3882 | 0.0382 | 0.4732 | up   |
| 205 | A0A0A6<br>YW53 | Mitogen-activated protein kinase kinase kinase kinase 4    | 0.6543 | 0.0393 | -0.612 | down |
| 206 | A2A841         | Band 4.1                                                   | 0.7993 | 0.0394 | -0.323 | down |
| 207 | A2AG50         | MAP7 domain-containing protein 2                           | 0.7927 | 0.0401 | -0.335 | down |
| 208 | A0A087<br>WQF0 | Phospholipid phosphatase-related protein type 2            | 0.8155 | 0.0404 | -0.295 | down |
| 209 | Q3UFS0         | Protein zyg-11 homolog B                                   | 1.2046 | 0.0417 | 0.2686 | up   |
| 210 | D3Y273         | Anion exchange protein                                     | 0.8163 | 0.0418 | -0.293 | down |
| 211 | P08551         | Neurofilament light polypeptide                            | 0.8303 | 0.0421 | -0.268 | down |
| 212 | Q9JIX8         | Apoptotic chromatin condensation inducer in the nucleus    | 0.8301 | 0.0422 | -0.269 | down |
| 213 | P28665         | Murinoglobulin-1                                           | 1.5118 | 0.0423 | 0.5963 | up   |
| 214 | E9Q3E2         | Synaptopodin                                               | 0.6568 | 0.0423 | -0.606 | down |
| 215 | Q9EQQ2         | Protein YIPF5                                              | 0.7545 | 0.0425 | -0.406 | down |
| 216 | P60898         | DNA-directed RNA polymerase II subunit RPB9                | 0.8186 | 0.0430 | -0.289 | down |
| 217 | B2RQS1         | Striatin-3                                                 | 0.8247 | 0.0431 | -0.278 | down |
| 218 | O55131         | Septin-7                                                   | 0.7237 | 0.0433 | -0.466 | down |
| 219 | A8DUK4         | Beta-globin                                                | 1.5222 | 0.0460 | 0.6062 | up   |
| 220 | Q66JR8         | Ptms protein                                               | 0.7999 | 0.0462 | -0.322 | down |
| 221 | P63040         | Complexin-1                                                | 0.8288 | 0.0472 | -0.271 | down |
| 222 | P40936         | Indolethylamine N-methyltransferase                        | 1.6576 | 0.0476 | 0.7291 | up   |
| 223 | P20917         | Myelin-associated glycoprotein                             | 0.7251 | 0.0479 | -0.464 | down |
| 224 | Q8BWS5         | G protein-regulated inducer of neurite outgrowth 3         | 0.7103 | 0.0492 | -0.493 | down |
| 225 | A3KMP2         | Tetrapeptide repeat protein 38                             | 1.2536 | 0.0496 | 0.3261 | up   |
| 226 | Q6P1H9         | Syt6 protein                                               | 0.7067 | 0.0496 | -0.501 | down |

**Supplementary Table S2.** Quantitative reverse transcription PCR primer sequences.

| Gene      | Primer sequence          | Species |
|-----------|--------------------------|---------|
| SLC7A11-F | TCCTGCTTTGGCTCCATGAACG   | Mouse   |
| SLC7A11-R | AGAGGAGTGTGCTTGC GGACAT  | Mouse   |
| GPX4-F    | ACAAGAACGGCTGCGTGGTGAA   | Mouse   |
| GPX4-R    | GCCACACACTTGTGGAGCTAGA   | Mouse   |
| FTH-F     | CCATCAACCGCCAGATCAAC     | Mouse   |
| FTH-R     | GAAACATCATCTCGGTCAAA     | Mouse   |
| ACTB-F    | GGCACCACACCTTCTACAACGAG  | Mouse   |
| ACTB-R    | TCATCTTCTCACGGTTGGCTTTGG | Mouse   |
